# Supplementary material for: NMR detection of the strained metallacycles in organolithiums: theoretical study
Source: Royal Society of Chemistry journal article supplement (doi:10.1039/d3ob01916k), 2023-12-26

# Supporting Information for

## NMR Descriptors of the Strained Metallacycles Formation in Organolithiums: Theoretical Study

Mark V. Kaplanskiy,<sup>[b]</sup> Valerii V. Karpov,<sup>[b,c]</sup> Elena Yu. Tupikina,<sup>\*[b]</sup> and Alexander S. Antonov<sup>\*[a]</sup>

Dedicated to Professor Alexander F. Pozharskii on the occasion of his 85th birthday.

- 
- [a] Dr. A.S. Antonov  
Institute of Organic Chemistry  
University of Regensburg  
D-93053 Regensburg, Germany  
E-mail: Alexander.Antonov@chemie.uni-regensburg.de
- [b] M.V. Kaplanskiy, V.V. Karpov, Dr. E.Yu. Tupikina  
Institute of Chemistry  
St. Petersburg State University  
198504 St. Petersburg, Russian Federation
- [c] V.V. Karpov (current address)  
Institut für Chemie  
Humboldt-Universität zu Berlin  
10099 Berlin, Germany

Supporting information for this article is given via a link at the end of the document.

### Table of Content

|          |                                                                                             |   |
|----------|---------------------------------------------------------------------------------------------|---|
| Table S1 | NMR properties for monomeric and dimeric metallacycles                                      | 2 |
| Table S2 | Geometrical properties for monomeric and dimeric metallacycles                              | 4 |
| Table S3 | Natural bond orbital (NBO) analysis for some carbanion metallacycles.                       | 6 |
|          | Computational details                                                                       | 7 |
|          | Optimized geometrical structures of studied compounds in “balls and sticks” representation. | 8 |

**Table S1.** NMR properties for monomeric and dimeric metallacycles.  ${}^{\text{FC}}K_{\text{CLi}}$  – reduced Fermi–contact interaction term;  ${}^{\text{SD}}K_{\text{CLi}}$  – reduced spin–dipole interaction term;  ${}^{\text{PSO}}K_{\text{CLi}}$  – reduced paramagnetic spin–orbital interaction term;  ${}^{\text{DSO}}K_{\text{CLi}}$  – reduced diamagnetic spin–orbital interaction term;  ${}^1K_{\text{CLi}}$  – reduced spin–spin interaction constant;  $\delta^{6,7}\text{Li}$  – lithium chemical shift which is independent on the isotope;  $\delta^{13}\text{C}$  carbon chemical shift. Reduced spin–spin interaction constants and corresponding terms could be converted to observable values by multiplying it to corresponding nuclear g-factors\*.

| Compound        | ${}^{\text{FC}}K_{\text{CLi}}$ ,<br>Hz | ${}^{\text{SD}}K_{\text{CLi}}$ ,<br>Hz | ${}^{\text{PSO}}K_{\text{CLi}}$ ,<br>Hz | ${}^{\text{DSO}}K_{\text{CLi}}$ ,<br>Hz | ${}^1K_{\text{CLi}}$ ,<br>Hz | $\delta^{6,7}\text{Li}$ ,<br>ppm | $\delta^{13}\text{C}$ ,<br>ppm |
|-----------------|----------------------------------------|----------------------------------------|-----------------------------------------|-----------------------------------------|------------------------------|----------------------------------|--------------------------------|
| <b>Monomers</b> |                                        |                                        |                                         |                                         |                              |                                  |                                |
| <b>6a</b>       | 13,367                                 | 0,071                                  | −0,080                                  | 0,108                                   | 13,5                         | 1,80                             | 227,37                         |
| <b>7a</b>       | 13,355                                 | 0,021                                  | −0,098                                  | 0,068                                   | 13,3                         | 2,56                             | −1,80                          |
| <b>8a</b>       | 6,909                                  | −0,059                                 | −0,035                                  | 0,069                                   | 6,9                          | −0,09                            | 173,99                         |
| <b>9a</b>       |                                        |                                        |                                         |                                         |                              |                                  |                                |
| <b>10a</b>      | 9,265                                  | −0,001                                 | −0,099                                  | 0,078                                   | 9,2                          | 1,61                             | 167,88                         |
| <b>11a**</b>    | 12,669                                 | 0,062                                  | −0,079                                  | 0,107                                   | 12,8                         | 2,36                             | 200,49                         |
| <b>12a</b>      | 12,172                                 | 0,016                                  | −0,103                                  | 0,083                                   | 12,2                         | 2,14                             | 24,10                          |
| <b>13a</b>      | 13,532                                 | 0,035                                  | −0,089                                  | 0,086                                   | 13,6                         | 1,60                             | 212,56                         |
| <b>14a</b>      | 13,425                                 | 0,073                                  | −0,082                                  | 0,109                                   | 13,5                         | 2,26                             | 228,44                         |
| <b>15a</b>      | 12,948                                 | 0,028                                  | −0,103                                  | 0,086                                   | 13,0                         | 2,10                             | 30,31                          |
| <b>16a</b>      | 13,842                                 | 0,083                                  | −0,057                                  | 0,088                                   | 14,0                         | 1,11                             | 263,95                         |
| <b>17a</b>      | 12,144                                 | 0,092                                  | −0,077                                  | 0,122                                   | 12,3                         | 2,45                             | 240,58                         |
| <b>18a</b>      | 12,710                                 | 0,017                                  | −0,106                                  | 0,089                                   | 12,7                         | 1,90                             | 26,08                          |
| <b>19a</b>      | 13,168                                 | 0,083                                  | −0,063                                  | 0,093                                   | 13,3                         | 1,00                             | 269,36                         |
| <b>20a</b>      | 13,167                                 | 0,082                                  | −0,084                                  | 0,123                                   | 13,3                         | 2,31                             | 235,74                         |
| <b>6b</b>       | 12,819                                 | 0,071                                  | −0,080                                  | 0,110                                   | 12,9                         | 1,69                             | 229,50                         |
| <b>7b</b>       | 12,699                                 | 0,023                                  | −0,097                                  | 0,069                                   | 12,7                         | 2,34                             | −2,42                          |
| <b>8b</b>       | 6,820                                  | −0,041                                 | −0,058                                  | 0,071                                   | 6,8                          | −0,19                            | 110,14                         |
| <b>9b</b>       | 6,417                                  | −0,004                                 | −0,085                                  | 0,078                                   | 6,4                          | 1,47                             | 27,73                          |
| <b>10b</b>      | 10,058                                 | −0,008                                 | −0,100                                  | 0,079                                   | 10,0                         | 1,59                             | 179,36                         |
| <b>11b</b>      | 10,045                                 | 0,011                                  | −0,110                                  | 0,110                                   | 10,1                         | 2,15                             | 214,58                         |
| <b>12b</b>      | 11,425                                 | 0,015                                  | −0,102                                  | 0,085                                   | 11,4                         | 2,34                             | 26,51                          |
| <b>13b</b>      | 12,812                                 | 0,029                                  | −0,090                                  | 0,088                                   | 12,8                         | 1,77                             | 218,76                         |
| <b>14b</b>      | 12,510                                 | 0,071                                  | −0,083                                  | 0,113                                   | 12,6                         | 2,42                             | 231,77                         |
| <b>15b</b>      | 11,857                                 | 0,029                                  | −0,104                                  | 0,089                                   | 11,9                         | 2,11                             | 30,77                          |
| <b>16b</b>      | 13,228                                 | 0,072                                  | −0,072                                  | 0,091                                   | 13,3                         | 1,35                             | 253,02                         |
| <b>17b</b>      | 11,806                                 | 0,097                                  | −0,077                                  | 0,126                                   | 12,0                         | 2,71                             | 241,37                         |
| <b>18b</b>      | 12,035                                 | 0,017                                  | −0,107                                  | 0,090                                   | 12,0                         | 2,27                             | 37,04                          |
| <b>19b</b>      | 12,913                                 | 0,082                                  | −0,064                                  | 0,094                                   | 13,0                         | 1,05                             | 262,70                         |
| <b>20b</b>      | 12,650                                 | 0,091                                  | −0,083                                  | 0,125                                   | 12,8                         | 2,30                             | 237,97                         |
| <b>6c</b>       | 12,452                                 | 0,075                                  | −0,081                                  | 0,109                                   | 12,6                         | 1,74                             | 231,64                         |
| <b>7c</b>       | 12,185                                 | 0,025                                  | −0,096                                  | 0,071                                   | 12,2                         | 2,58                             | 2,86                           |
| <b>8c</b>       | 7,258                                  | −0,033                                 | −0,086                                  | 0,080                                   | 7,2                          | 0,74                             | 75,42                          |
| <b>9c</b>       | 7,928                                  | −0,007                                 | −0,087                                  | 0,083                                   | 7,9                          | 1,60                             | 26,93                          |
| <b>10c</b>      | 8,868                                  | −0,009                                 | −0,108                                  | 0,082                                   | 8,8                          | 1,58                             | 208,82                         |
| <b>11c</b>      | 8,552                                  | 0,016                                  | −0,118                                  | 0,114                                   | 8,6                          | 2,45                             | 233,17                         |
| <b>12c</b>      | 11,099                                 | 0,008                                  | −0,103                                  | 0,087                                   | 11,1                         | 2,62                             | 25,54                          |
| <b>13c</b>      | 12,133                                 | 0,027                                  | −0,090                                  | 0,090                                   | 12,2                         | 2,06                             | 221,08                         |
| <b>14c</b>      | 11,454                                 | 0,047                                  | −0,089                                  | 0,117                                   | 11,5                         | 2,81                             | 237,21                         |

|               |        |        |        |       |      |       |        |
|---------------|--------|--------|--------|-------|------|-------|--------|
| <b>15c</b>    | 11,483 | 0,030  | -0,106 | 0,091 | 11,5 | 2,56  | 31,35  |
| <b>16c</b>    | 12,570 | 0,075  | -0,048 | 0,093 | 12,7 | 1,55  | 258,21 |
| <b>17c</b>    | 11,377 | 0,096  | -0,070 | 0,128 | 11,5 | 3,03  | 240,18 |
| <b>18c</b>    | 12,102 | 0,034  | -0,107 | 0,091 | 12,1 | 2,29  | 29,60  |
| <b>19c</b>    | 12,278 | 0,063  | -0,065 | 0,095 | 12,4 | 1,18  | 256,78 |
| <b>20c</b>    | 12,329 | 0,092  | -0,086 | 0,128 | 12,5 | 2,50  | 237,41 |
| <b>6d</b>     | 10,274 | 0,074  | -0,065 | 0,100 | 10,4 | 2,89  | 240,64 |
| <b>7d</b>     | 10,252 | 0,021  | -0,080 | 0,061 | 10,3 | 3,39  | -0,44  |
| <b>9d</b>     | 7,419  | -0,020 | -0,090 | 0,077 | 7,4  | 2,94  | 31,35  |
| <b>8d</b>     | 5,271  | -0,015 | -0,113 | 0,077 | 5,2  | 4,18  | 53,13  |
| <b>10d</b>    | 7,158  | -0,020 | -0,117 | 0,079 | 7,1  | 2,90  | 208,23 |
| <b>11d</b>    | 7,953  | -0,030 | -0,117 | 0,117 | 7,9  | -0,31 | 230,42 |
| <b>12d</b>    | 9,025  | 0,003  | -0,093 | 0,082 | 9,0  | 3,78  | 33,11  |
| <b>13d</b>    | 10,418 | 0,009  | -0,090 | 0,084 | 10,4 | 3,47  | 213,11 |
| <b>14d</b>    | 10,257 | 0,024  | -0,103 | 0,116 | 10,3 | 2,68  | 242,97 |
| <b>15d</b>    | 9,562  | 0,022  | -0,094 | 0,084 | 9,6  | 3,80  | 34,36  |
| <b>16d</b>    | 13,837 | 0,028  | -0,071 | 0,091 | 13,9 | 1,11  | 199,92 |
| <b>17d</b>    | 12,048 | 0,094  | -0,068 | 0,122 | 12,2 | 2,32  | 233,69 |
| <b>18d</b>    | 9,823  | 0,031  | -0,093 | 0,085 | 9,8  | 3,19  | 32,78  |
| <b>19d</b>    | 11,064 | 0,065  | -0,057 | 0,088 | 11,2 | 2,35  | 249,44 |
| <b>20d</b>    | 11,998 | 0,096  | -0,067 | 0,125 | 12,2 | 2,34  | 238,85 |
| <b>Dimers</b> |        |        |        |       |      |       |        |
| <b>21a</b>    | 8,613  | 0,024  | -0,095 | 0,114 | 8,7  | 2,02  | 201,06 |
| <b>22a</b>    | 7,152  | -0,002 | -0,095 | 0,075 | 7,1  | 3,35  | 2,76   |
| <b>23a</b>    | 1,405  | -0,027 | -0,046 | 0,063 | 1,4  | 0,77  | 107,05 |
| <b>24a</b>    | 3,440  | -0,007 | -0,076 | 0,079 | 3,4  | 2,80  | 30,29  |
| <b>25a</b>    | 3,337  | -0,009 | -0,107 | 0,104 | 3,3  | 2,79  | 181,13 |
| <b>26a</b>    | 6,592  | 0,004  | -0,101 | 0,091 | 6,6  | 3,12  | 29,53  |
| <b>27a</b>    | 5,763  | 0,003  | -0,103 | 0,116 | 5,8  | 3,45  | 198,66 |
| <b>28a</b>    | 7,478  | 0,009  | -0,105 | 0,092 | 7,5  | 2,70  | 28,78  |
| <b>29a</b>    | 9,440  | 0,057  | -0,098 | 0,135 | 9,5  | 2,18  | 207,42 |
| <b>30a</b>    | 7,580  | 0,005  | -0,112 | 0,096 | 7,6  | 2,76  | 37,30  |
| <b>31a</b>    | 9,458  | 0,048  | -0,108 | 0,135 | 9,5  | 2,01  | 203,06 |
| <b>21b</b>    | 8,191  | 0,020  | -0,092 | 0,114 | 8,2  | 2,26  | 201,61 |
| <b>22b</b>    | 7,134  | -0,002 | -0,093 | 0,076 | 7,1  | 3,28  | 5,83   |
| <b>23b</b>    | 1,397  | -0,020 | -0,062 | 0,072 | 1,4  | 1,55  | 75,72  |
| <b>24b</b>    | 3,945  | -0,007 | -0,078 | 0,083 | 3,9  | 2,84  | 28,41  |
| <b>25b</b>    | 2,884  | -0,019 | -0,110 | 0,111 | 2,9  | 2,29  | 192,38 |
| <b>26b</b>    | 6,788  | 0,005  | -0,103 | 0,093 | 6,8  | 3,54  | 32,93  |
| <b>27b</b>    | 6,666  | 0,009  | -0,105 | 0,120 | 6,7  | 3,77  | 200,87 |
| <b>28b</b>    | 7,516  | 0,009  | -0,107 | 0,096 | 7,5  | 2,96  | 30,15  |
| <b>29b</b>    | 9,497  | 0,065  | -0,093 | 0,136 | 9,6  | 2,19  | 204,73 |
| <b>30b</b>    | 8,337  | 0,016  | -0,108 | 0,097 | 8,3  | 3,02  | 40,25  |
| <b>31b</b>    | 9,274  | 0,046  | -0,111 | 0,137 | 9,3  | 2,28  | 225,21 |

\*g-factor  $^{13}\text{C}$  = 1.40482; g-factor  $^6\text{Li}$  = 0.8220; g-factor  $^7\text{Li}$  = 2.17096.

**Table S2.** Geometrical properties for monomeric and dimeric metallacycles. Metallacycle's size – describe formal size of the cycle;  $r_{\text{CLi}}$  – carbon and lithium interatomic distance;  $\angle\alpha$  – intracycle valence angle X–C–Li, where X = C, N, O or F.

| Compound        | Metallacycle's size | $r_{\text{CLi}}$ , Å | $\angle\alpha$ , ° |
|-----------------|---------------------|----------------------|--------------------|
| <b>Monomers</b> |                     |                      |                    |
| <b>6a</b>       | 0                   | 2,074                |                    |
| <b>7a</b>       | 0                   | 2,092                |                    |
| <b>8a</b>       | 3                   | 2,022                | 62,3               |
| <b>9a</b>       | 4                   |                      |                    |
| <b>10a</b>      | 4                   | 2,081                | 89,3               |
| <b>11a</b>      | 4                   | 2,067                | 117,3              |
| <b>12a</b>      | 5                   | 2,102                | 96,6               |
| <b>13a</b>      | 5                   | 2,061                | 106,8              |
| <b>14a</b>      | 5                   | 2,074                | 108,6              |
| <b>15a</b>      | 6                   | 2,091                | 108,6              |
| <b>16a</b>      | 6                   | 2,056                | 119,0              |
| <b>17a</b>      | 6                   | 2,033                | 125,0              |
| <b>18a</b>      | 7                   | 2,085                | 103,0              |
| <b>19a</b>      | 7                   | 2,078                | 122,8              |
| <b>20a</b>      | 7                   | 2,034                | 128,3              |
| <b>6b</b>       | 0                   | 2,079                | 90,6               |
| <b>7b</b>       | 0                   | 2,100                |                    |
| <b>8b</b>       | 3                   | 2,044                | 61,5               |
| <b>9b</b>       | 4                   | 2,144                | 84,9               |
| <b>10b</b>      | 4                   | 2,075                | 87,4               |
| <b>11b</b>      | 4                   | 2,079                | 88,6               |
| <b>12b</b>      | 5                   | 2,113                | 97,2               |
| <b>13b</b>      | 5                   | 2,074                | 104,6              |
| <b>14b</b>      | 5                   | 2,073                | 107,3              |
| <b>15b</b>      | 6                   | 2,086                | 107,8              |
| <b>16b</b>      | 6                   | 2,051                | 117,5              |
| <b>17b</b>      | 6                   | 2,014                | 122,1              |
| <b>18b</b>      | 7                   | 2,112                | 115,4              |
| <b>19b</b>      | 7                   | 2,077                | 124,0              |
| <b>20b</b>      | 7                   | 2,029                | 125,7              |
| <b>6c</b>       | 0                   | 2,095                |                    |
| <b>7c</b>       | 0                   | 2,115                |                    |
| <b>8c</b>       | 3                   | 2,024                | 67,6               |
| <b>9c</b>       | 4                   | 2,112                | 80,9               |
| <b>10c</b>      | 4                   | 2,064                | 86,3               |
| <b>11c</b>      | 4                   | 2,058                | 88,3               |
| <b>12c</b>      | 5                   | 2,099                | 100,4              |
| <b>13c</b>      | 5                   | 2,075                | 104,2              |
| <b>14c</b>      | 5                   | 2,074                | 104,8              |
| <b>15c</b>      | 6                   | 2,083                | 105,4              |
| <b>16c</b>      | 6                   | 2,069                | 114,3              |
| <b>17c</b>      | 6                   | 2,030                | 119,3              |
| <b>18c</b>      | 7                   | 2,121                | 114,8              |

|               |   |       |       |
|---------------|---|-------|-------|
| <b>19c</b>    | 7 | 2,080 | 116,7 |
| <b>20c</b>    | 7 | 2,029 | 126,7 |
| <b>6d</b>     | 0 | 2,154 |       |
| <b>7d</b>     | 0 | 2,192 |       |
| <b>8d</b>     | 3 | 2,028 | 68,4  |
| <b>9d</b>     | 4 | 2,108 | 75,6  |
| <b>10d</b>    | 4 | 2,049 | 81,3  |
| <b>11d</b>    | 4 | 2,034 | 77,6  |
| <b>12d</b>    | 5 | 2,135 | 91,9  |
| <b>13d</b>    | 5 | 2,107 | 100,0 |
| <b>14d</b>    | 5 | 2,084 | 98,7  |
| <b>15d</b>    | 6 | 2,126 | 101,4 |
| <b>16d</b>    | 6 | 2,083 | 108,7 |
| <b>17d</b>    | 6 | 2,052 | 117,3 |
| <b>18d</b>    | 7 | 2,175 | 108,9 |
| <b>19d</b>    | 7 | 2,131 | 118,7 |
| <b>20d</b>    | 7 | 2,057 | 122,1 |
| <b>Dimers</b> |   |       |       |
| <b>21a</b>    | 0 | 2,167 |       |
| <b>22a</b>    | 0 | 2,174 |       |
| <b>23a</b>    | 3 | 2,227 | 56,8  |
| <b>24a</b>    | 4 | 2,263 | 83,1  |
| <b>25a</b>    | 4 | 2,264 | 80,4  |
| <b>26a</b>    | 5 | 2,205 | 94,8  |
| <b>27a</b>    | 5 | 2,272 | 96,2  |
| <b>28a</b>    | 6 | 2,197 | 107,5 |
| <b>29a</b>    | 6 | 2,096 | 122,4 |
| <b>30a</b>    | 7 | 2,205 | 114,8 |
| <b>31a</b>    | 7 | 2,122 | 131,3 |
| <b>21b</b>    | 0 | 2,184 |       |
| <b>22b</b>    | 0 | 2,194 |       |
| <b>23b</b>    | 3 | 2,206 | 63,3  |
| <b>24b</b>    | 4 | 2,246 | 78,6  |
| <b>25b</b>    | 4 | 2,221 | 78,4  |
| <b>26b</b>    | 5 | 2,199 | 97,0  |
| <b>27b</b>    | 5 | 2,227 | 99,2  |
| <b>28b</b>    | 6 | 2,188 | 106,6 |
| <b>29b</b>    | 6 | 2,112 | 121,0 |
| <b>30b</b>    | 7 | 2,181 | 110,1 |
| <b>31b</b>    | 7 | 2,113 | 132,1 |

**Table S3.** Natural bond orbital (NBO) analysis for some carbanion metallacycles. Orbital types are divided into Lewis's orbitals and non-Lewis's orbitals. Core (CR), bond (BD) and lone pair (LP) orbitals correspond to former type; Lewis's low-valence (LV), anti-bond (BD\*) and Rydberg's (Ry) orbitals correspond to later type. Occupancy describes the effective electrons number on the natural orbital; Hybridization describes the atomic orbital composition of the natural orbital;  $E$  – is the orbital interaction energy obtained by second order perturbation theory.

| Complex    | Orbital type* |    | Occupancy |       | Hybridization      |    | $E$ ,<br>kcal/mol |
|------------|---------------|----|-----------|-------|--------------------|----|-------------------|
|            | C             | Li | C         | Li    | C                  | Li |                   |
| <b>7d</b>  | LP            | Ry | 1.907     | 0.188 | sp <sup>3.35</sup> | s  | 31.04             |
| <b>8d</b>  | LP            | LV | 1.844     | 0.171 | sp <sup>4.97</sup> | s  | 12.14             |
| <b>9d</b>  | LP            | LV | 1.828     | 0.232 | sp <sup>3.92</sup> | s  | 25.37             |
| <b>12d</b> | LP            | LV | 1.846     | 0.204 | sp <sup>3.50</sup> | s  | 27.78             |
| <b>15d</b> | LP            | LV | 1.852     | 0.196 | sp <sup>3.31</sup> | s  | 29.90             |
| <b>18d</b> | LP            | LV | 1.865     | 0.190 | sp <sup>3.34</sup> | s  | 23.97             |

## Computational details

All calculations were performed using Gaussian16 software version C.01. Geometries of all compounds were optimized to the minimum on the potential energy surface (PES) using B3LYP/def2-TZVP level of theory and PCM(Et<sub>2</sub>O) scheme to include implicit solvent effects. For modeling explicit solvent effects, we used Me<sub>2</sub>O instead of Et<sub>2</sub>O to save computational time. We used dispersion correction GD3BJ to improve geometry description. Optimized geometries were checked for the absence of imaginary frequencies and were satisfied standard for Gaussian16 convergence criteria. For numerical integrations UltraFine grid was used.

In our previous work, we found that the combination of the WP04 functional and the aug-pcSseg-1 basis set gives accurate description of <sup>1</sup>J<sub>CLi</sub>. We used this combination as well as PCM(Et<sub>2</sub>O) scheme to calculate <sup>1</sup>J<sub>CLi</sub>, carbon and lithium shielding constants values. The last two were then converted to chemical shifts using eq 1:

$$\delta = \sigma^{ref} - \sigma, \quad 1$$

$\delta$  – carbon or lithium chemical shift value;  $\sigma$  – carbon or lithium shielding constant value;  $\sigma^{ref}$  – shielding constant value of the corresponding nuclear in a reference system. In case of carbon nuclear the reference system is tetramethylsilane and in case of lithium nuclear – lithium cation solvated by water molecules. In both cases the geometry optimization procedure and shielding calculations for the reference systems were performed in the same level of theory as for the studied complexes.

Optimized geometrical structures of studied compounds in “balls and sticks” representation.

**Compound**

**Structure**

**6a**

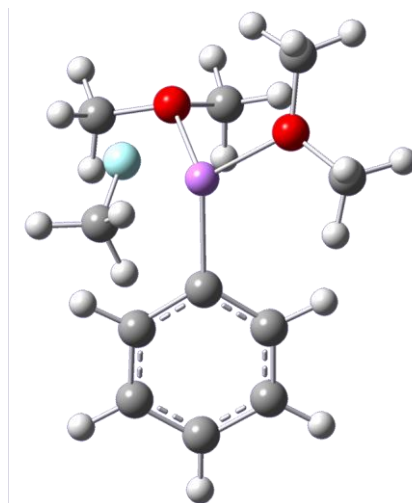

**7a**

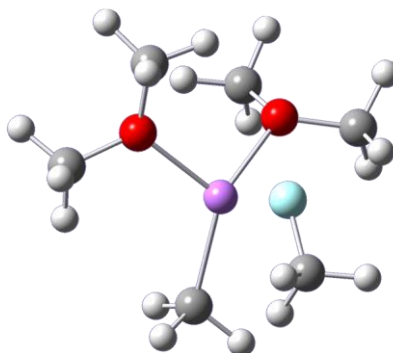

**8a**

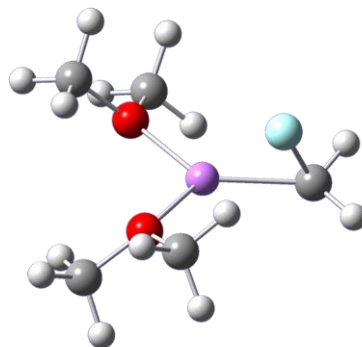

**9a**

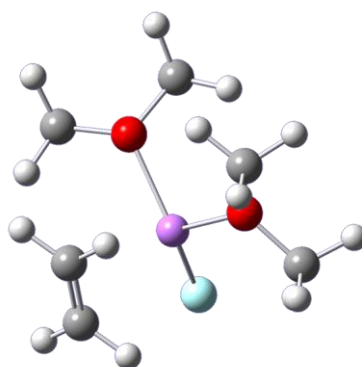



10a

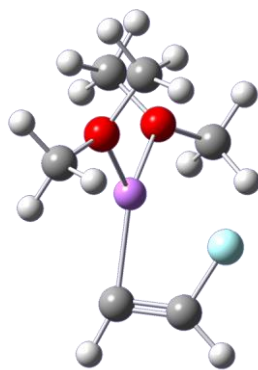

11a

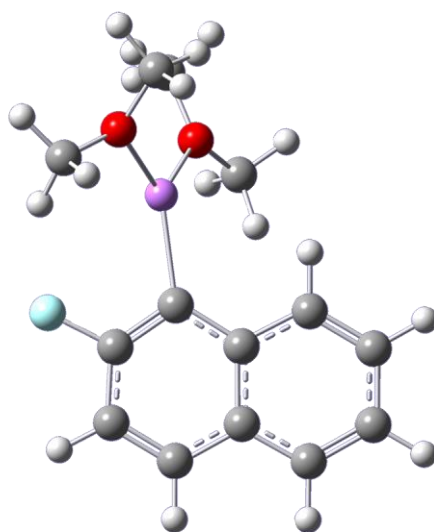

12a

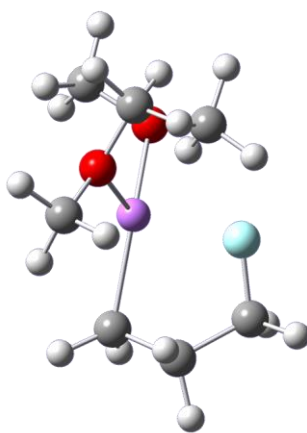

13a

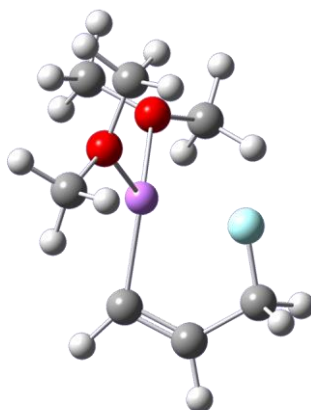

14a

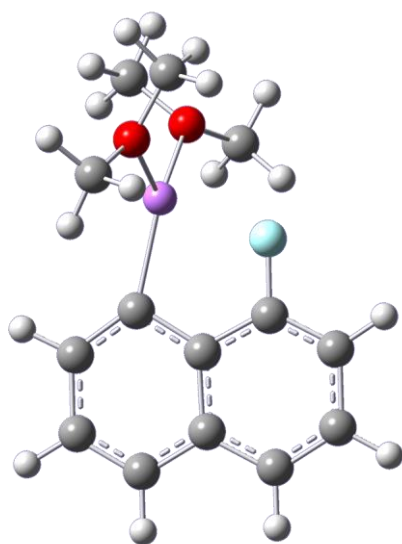

15a

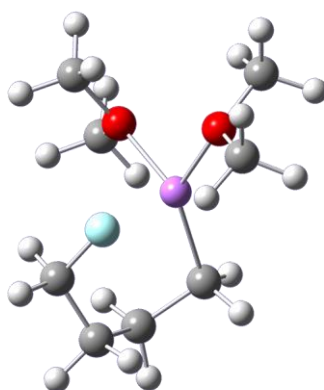

16a

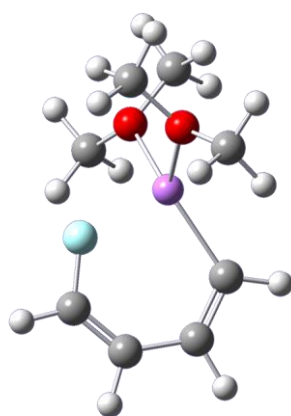

17a

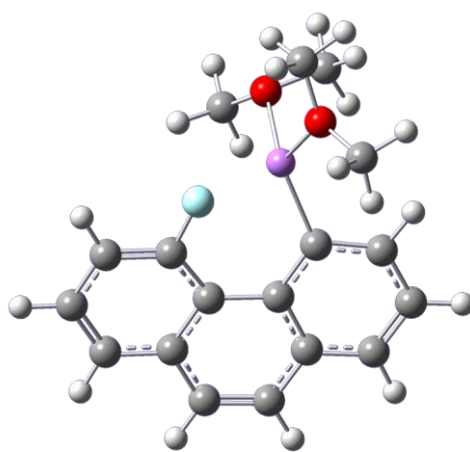

18a

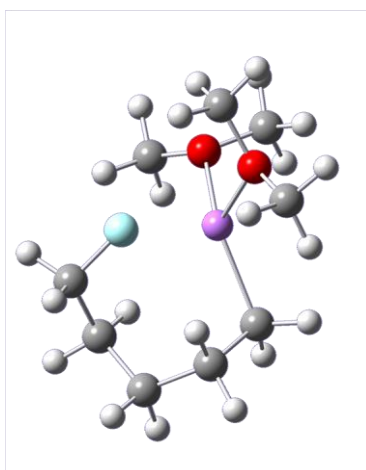

19a

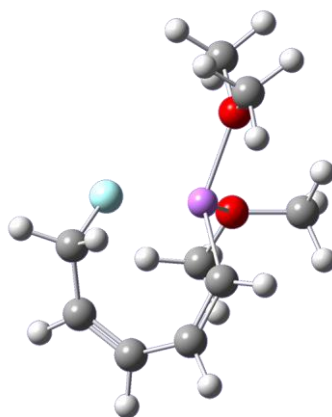

20a

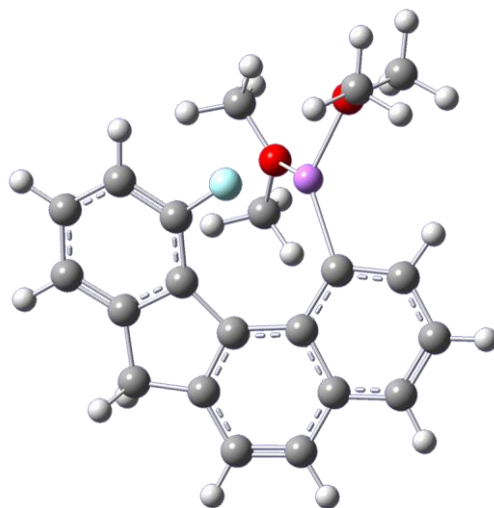

6b

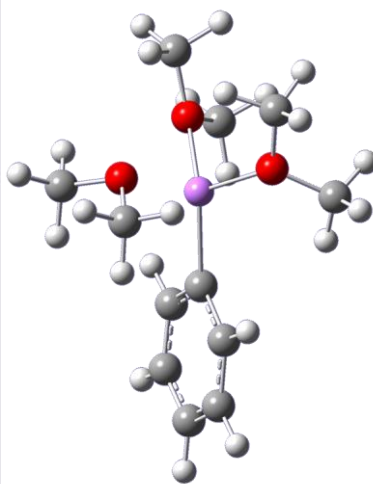

7b

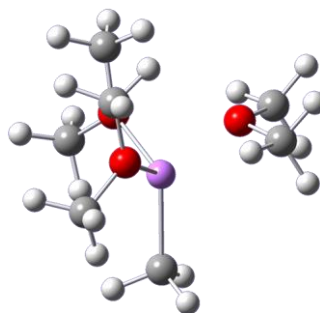

8b

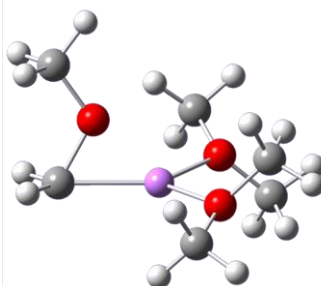

9b

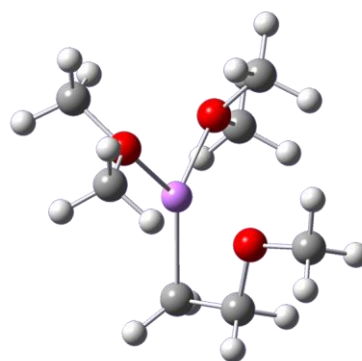

10b

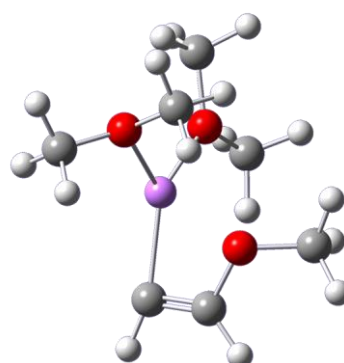

11b

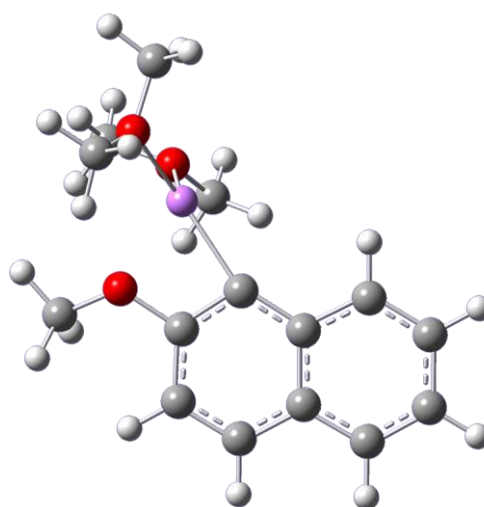

12b

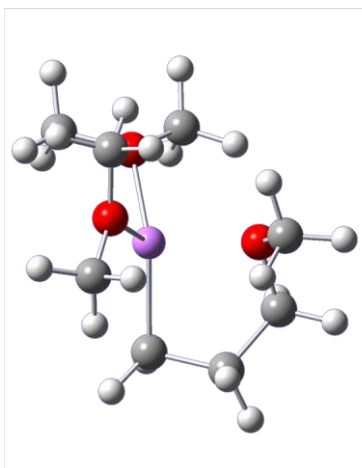

13b

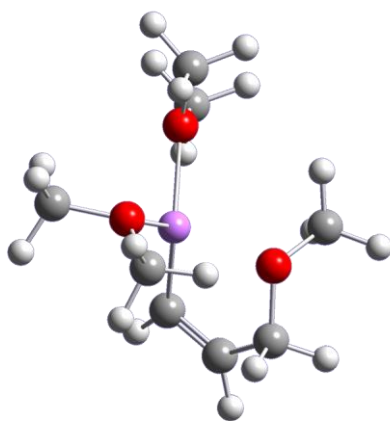

14b

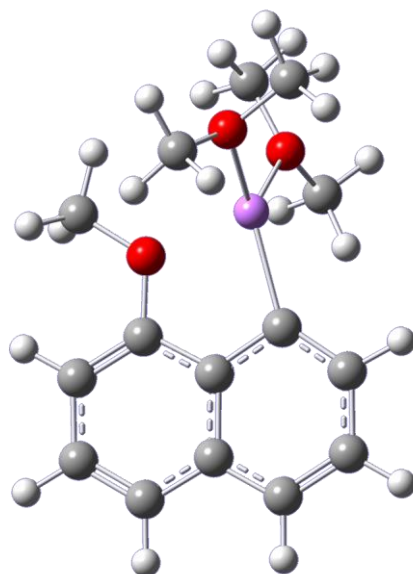

15b

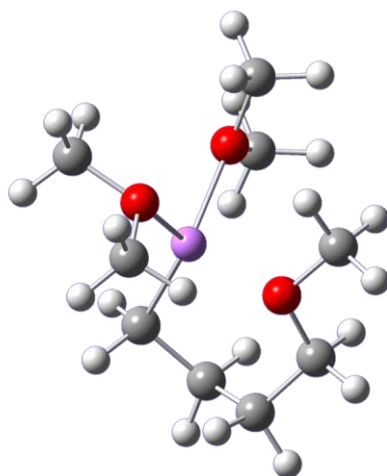

16b

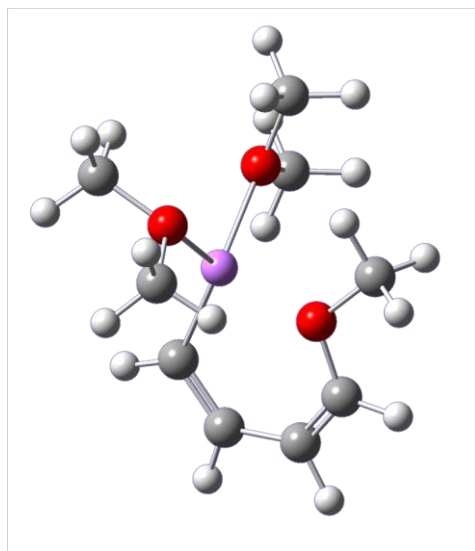

17b

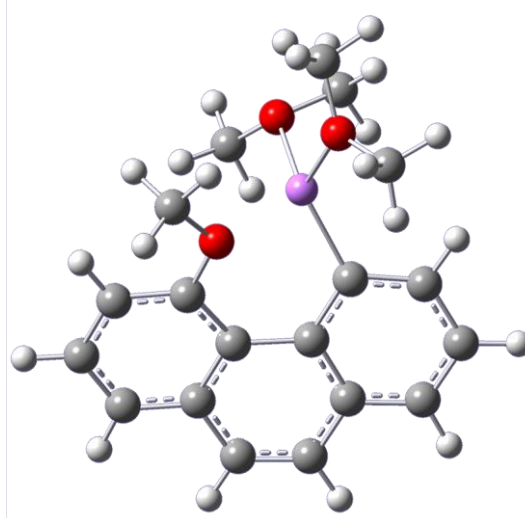

18b

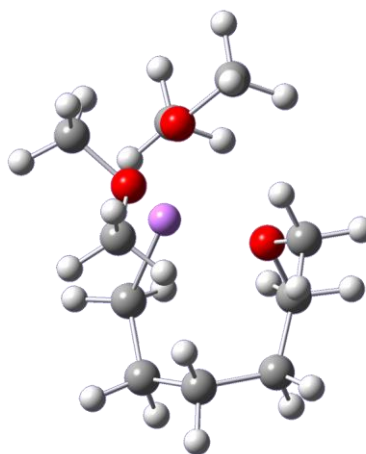

19b

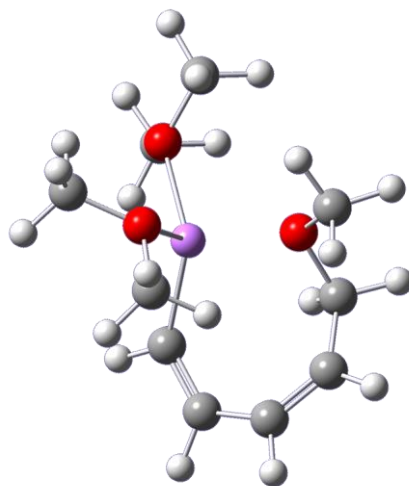

20b

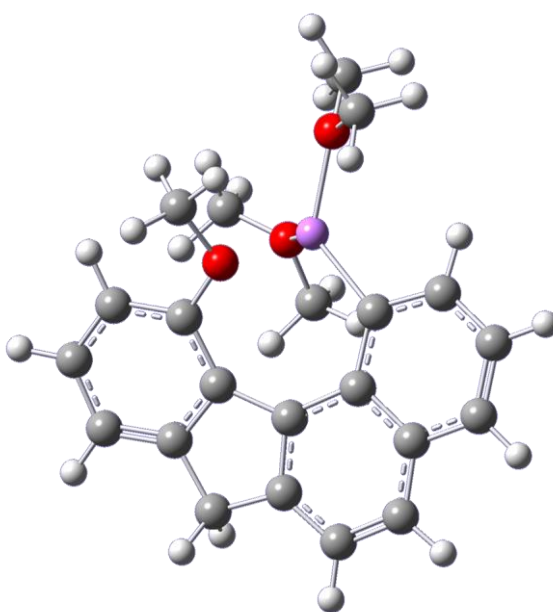

6c

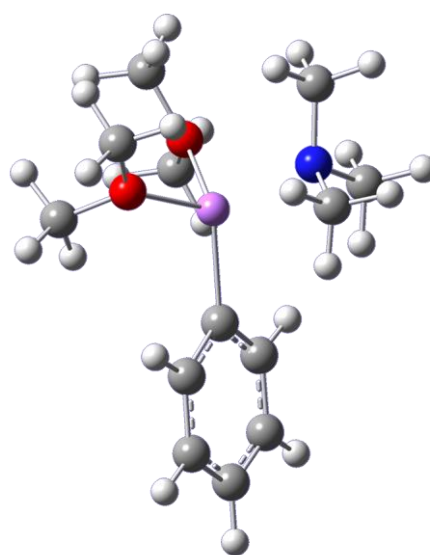



7c

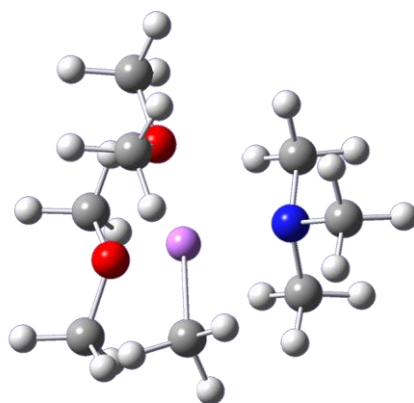

8c

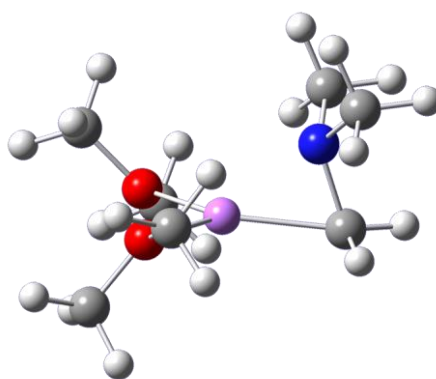

9c

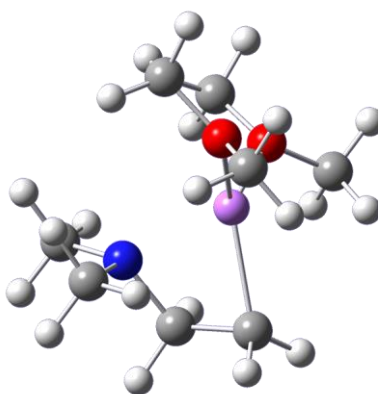

10c

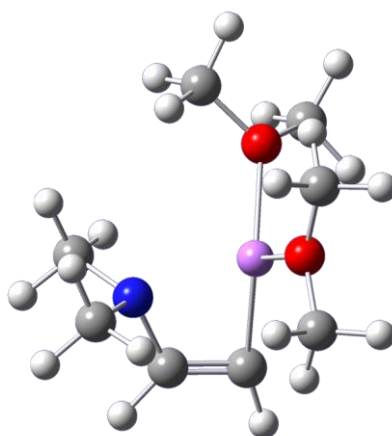

11c

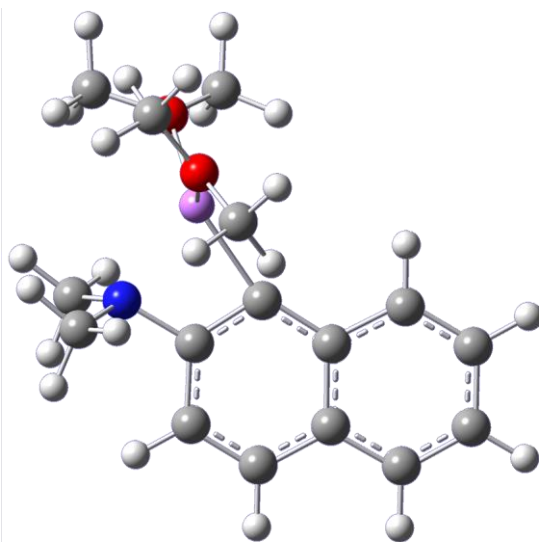

12c

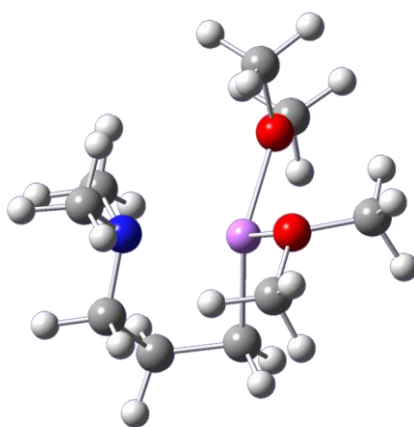

13c

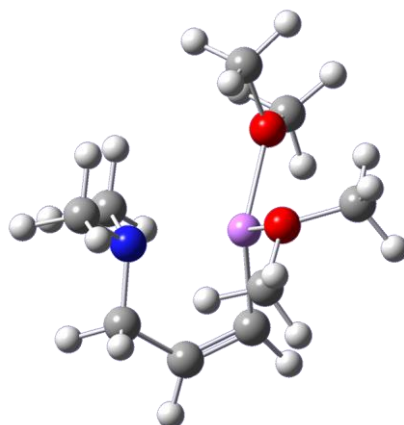

14c

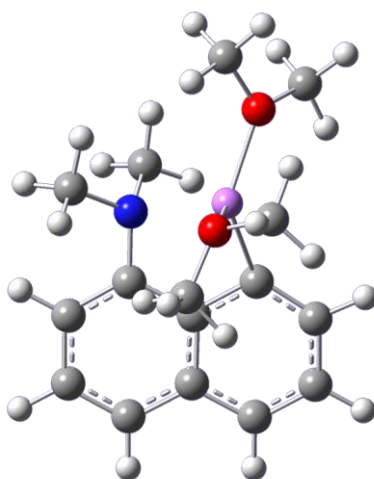

15c

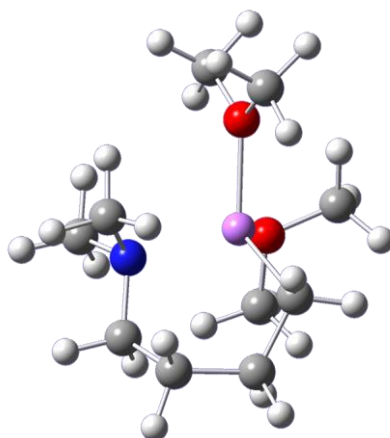

16c

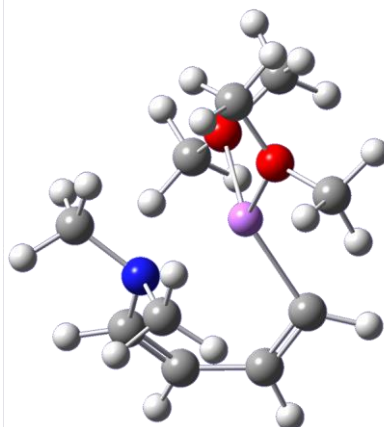

17c

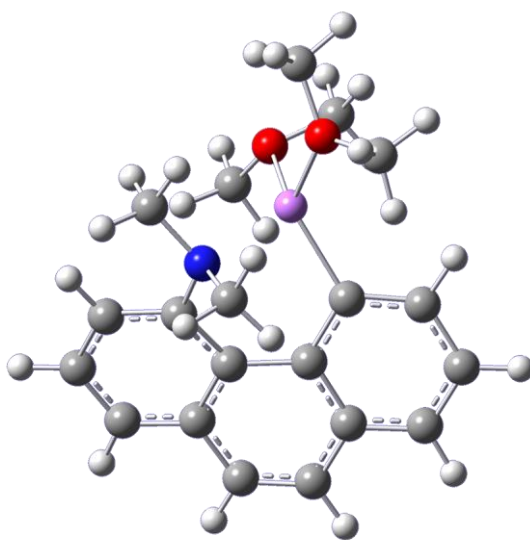

18c

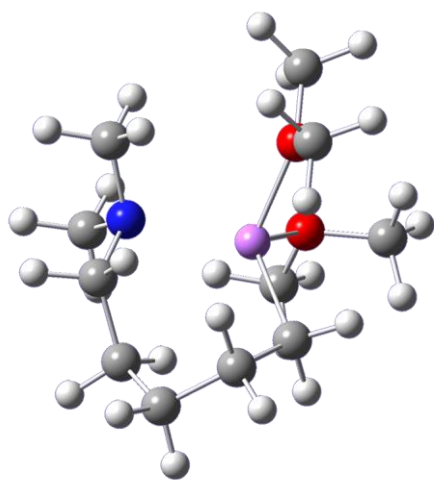

19c

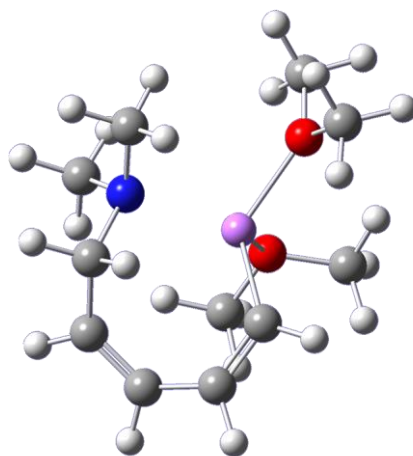

20c

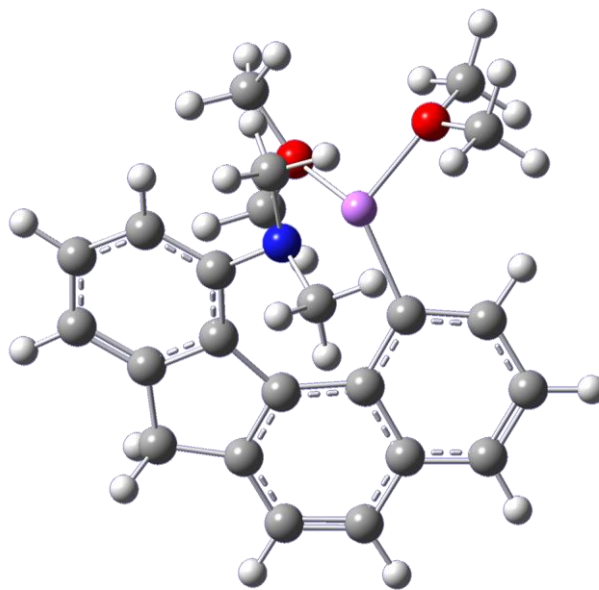

6d

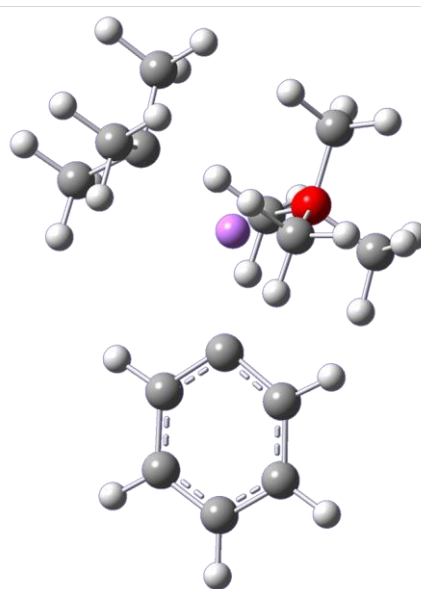

7d

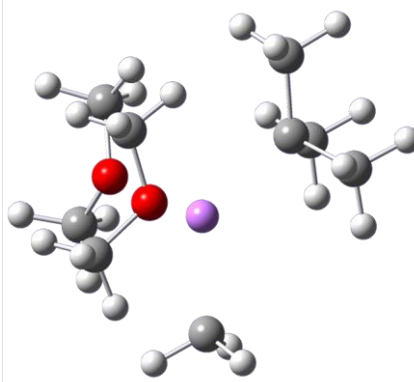

8d

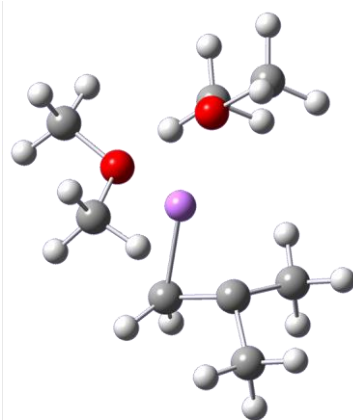

9d

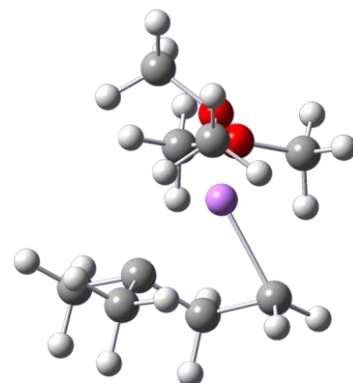

10d

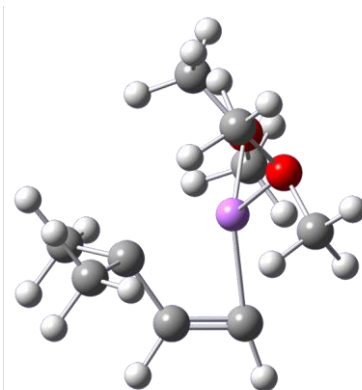

11d

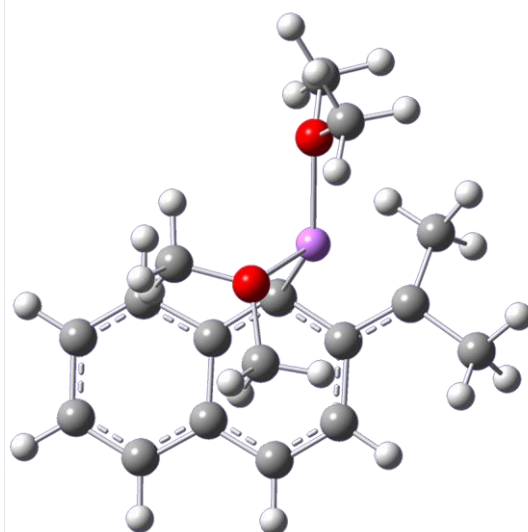

12d

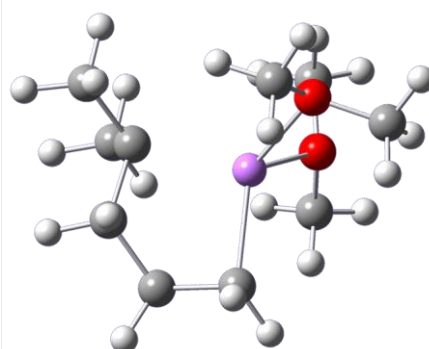

13d

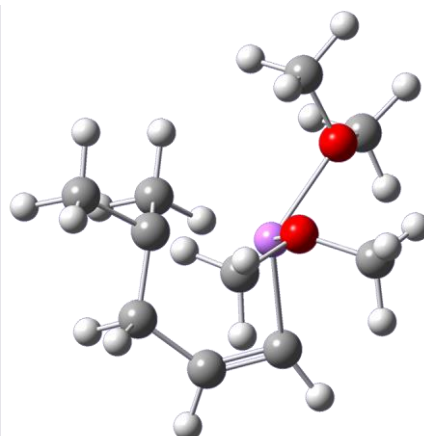

14d

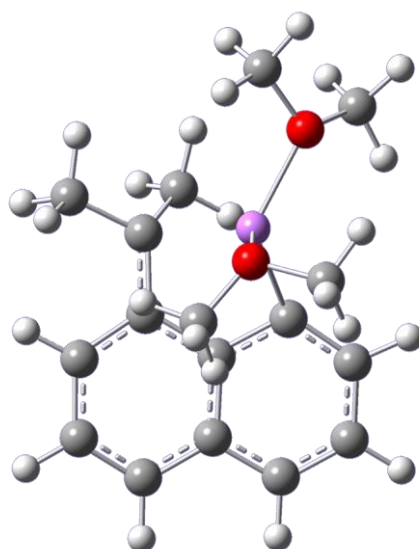

15d

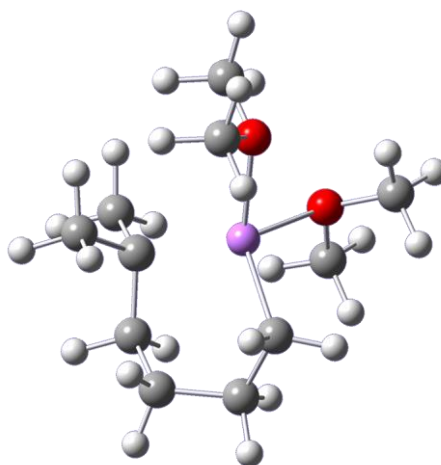

16d

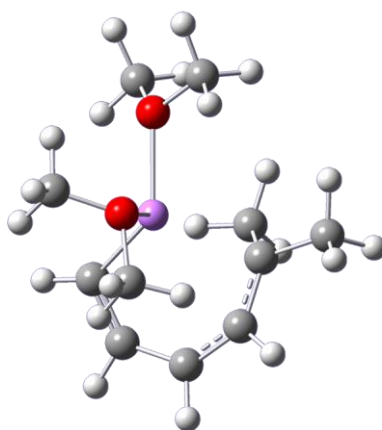

17d

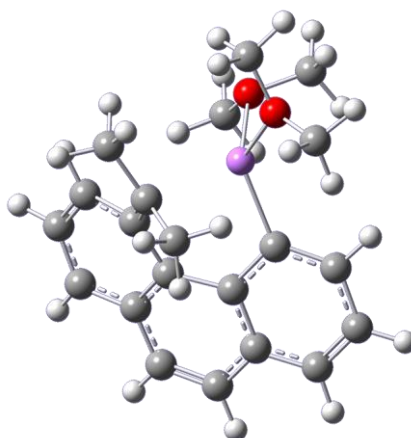



18d

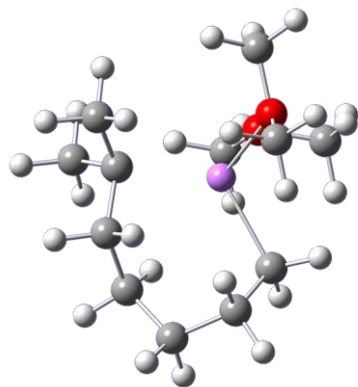

19d

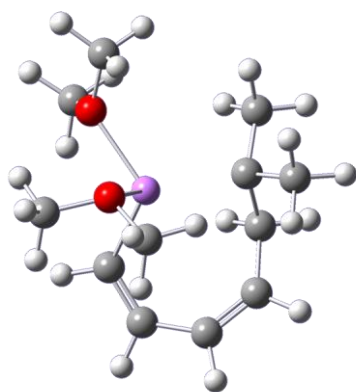

20d

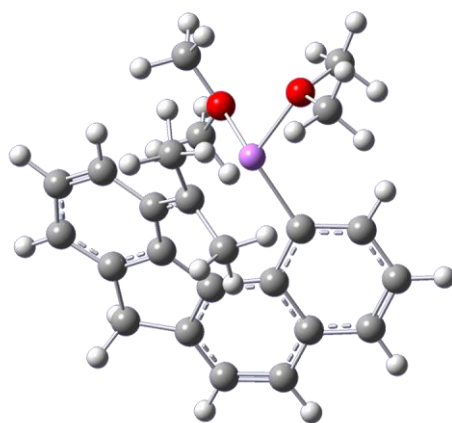

21a

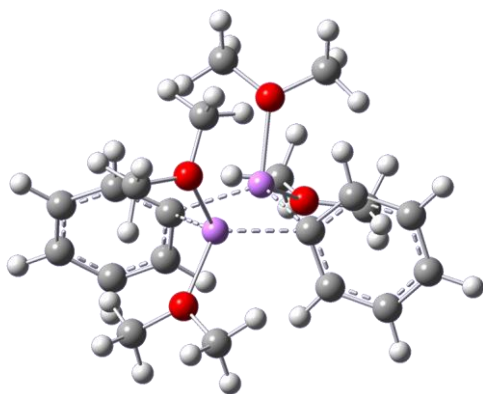

22a

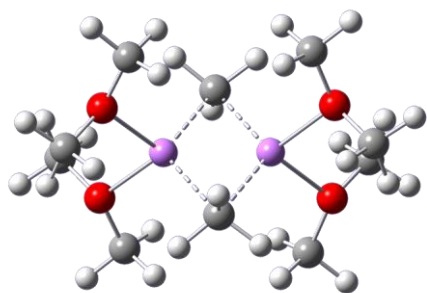

23a

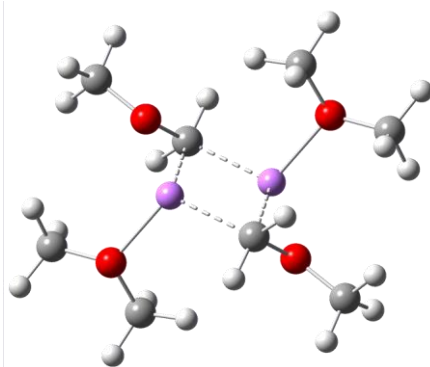

24a

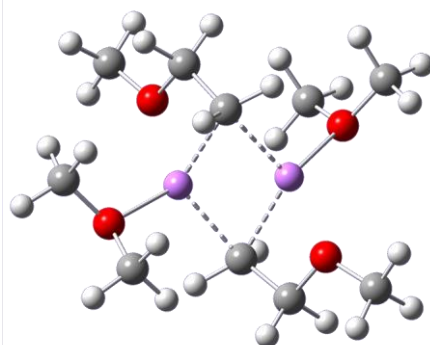

25a

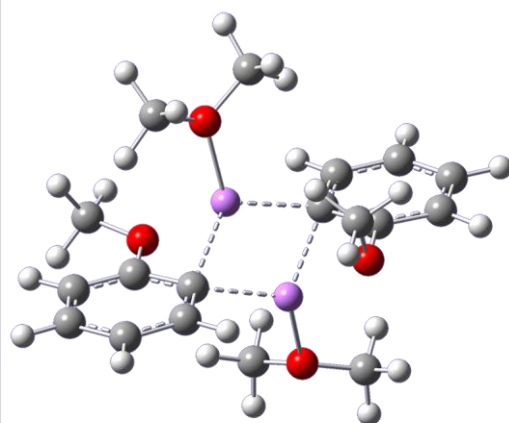

26a

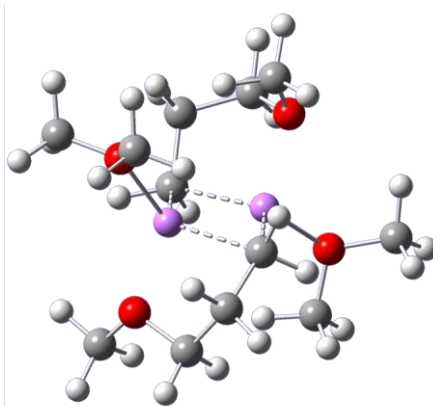

27a

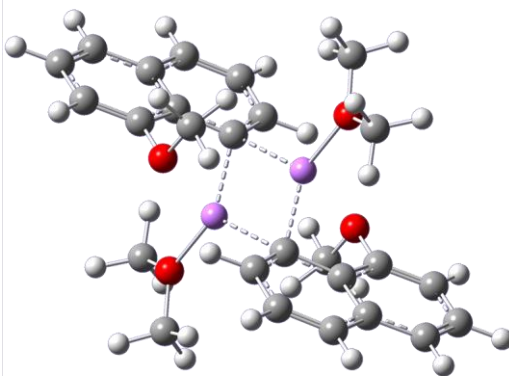

28a

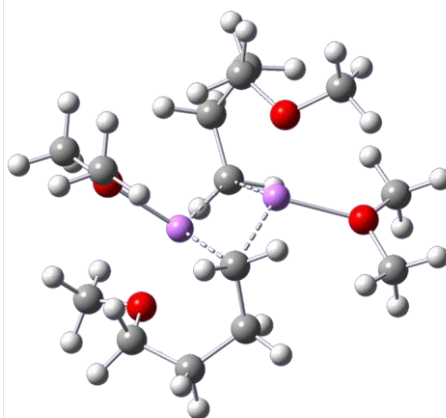

29a

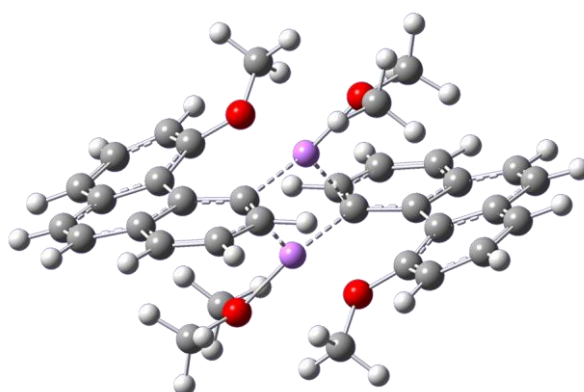

30a

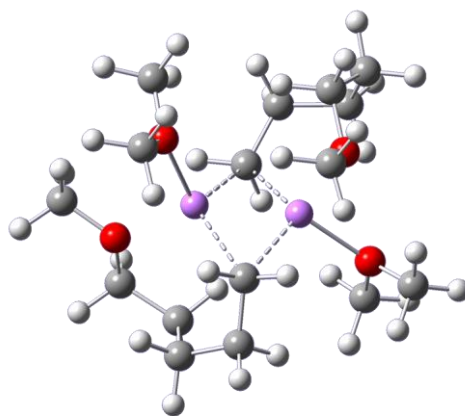

31a

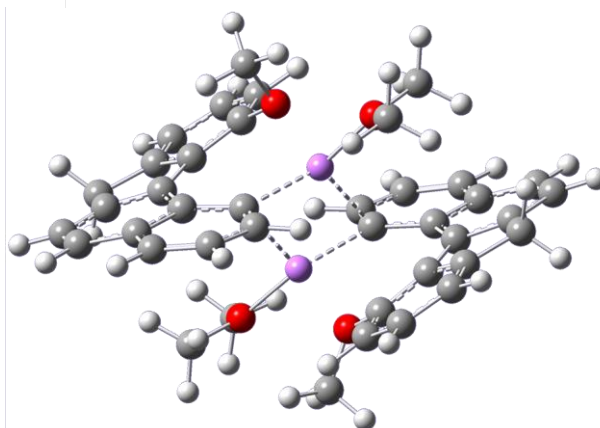

21b

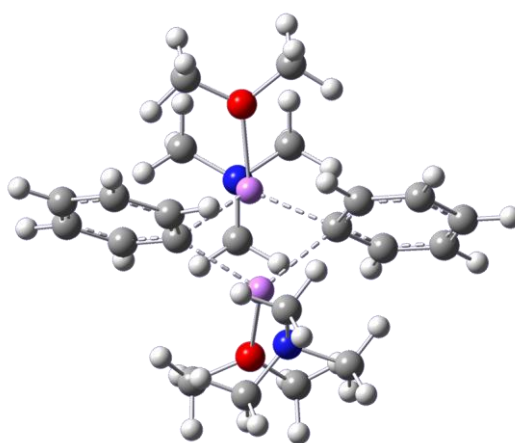

22b

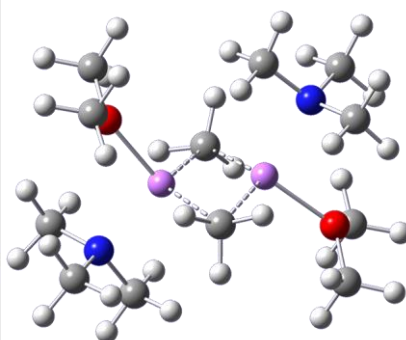

23b

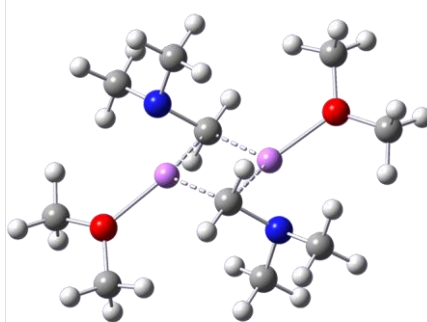

24b

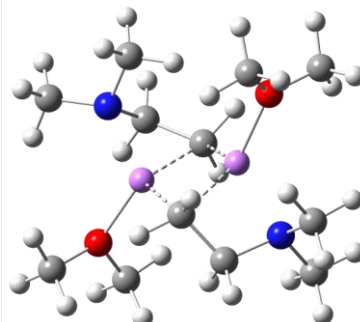

25b

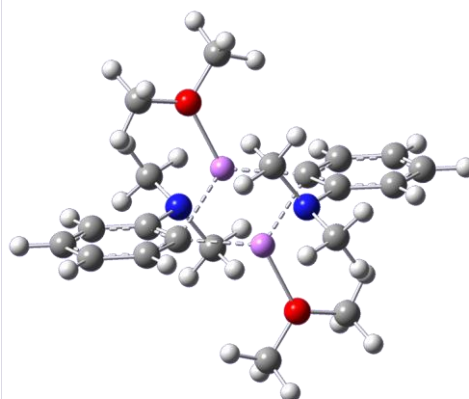

26b

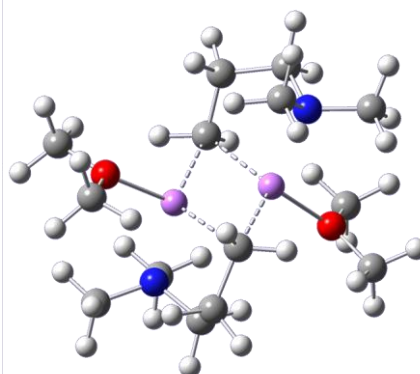

27b

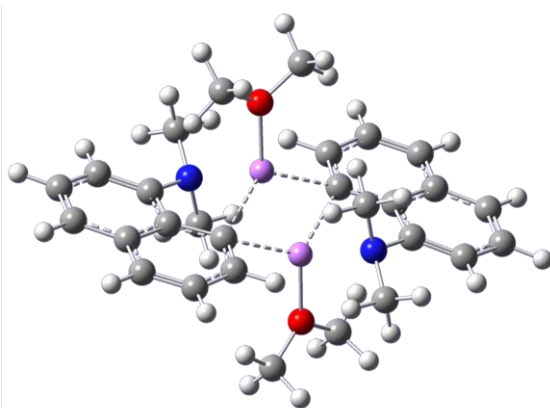

28b

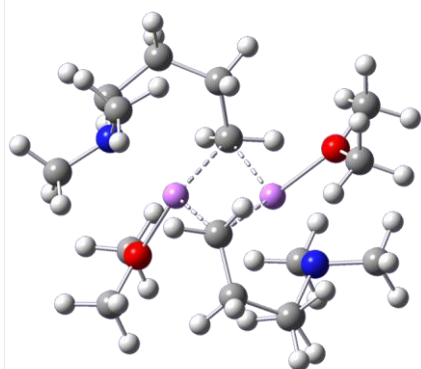

29b

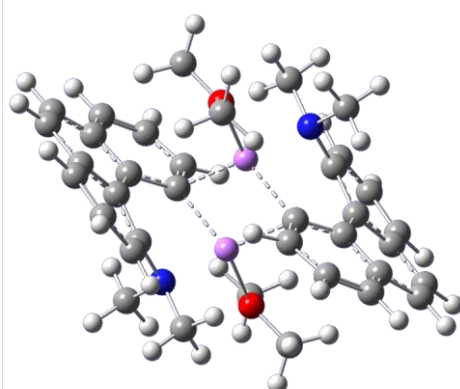

30b

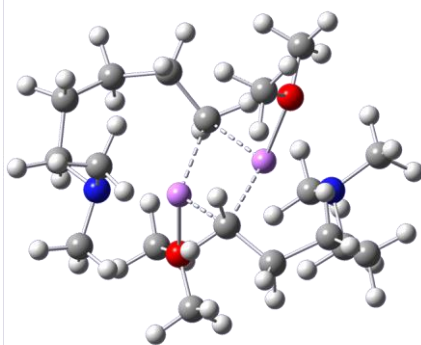

31b

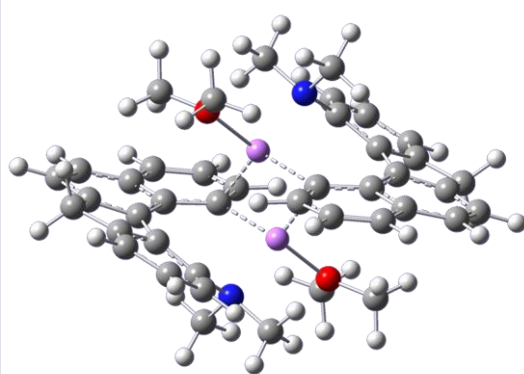

Supplement: d3ob01916k2.pdf [file d3ob01916k2.pdf]
